# Supplementary material
Source: PubMed Central journal article supplement (PMC10026701)
Supplement: NIHMS1875484-supplement-Supplementary_Figures_and_Supp_Tables_1-6.pdf [file NIHMS1875484-supplement-Supplementary_Figures_and_Supp_Tables_1-6.pdf]

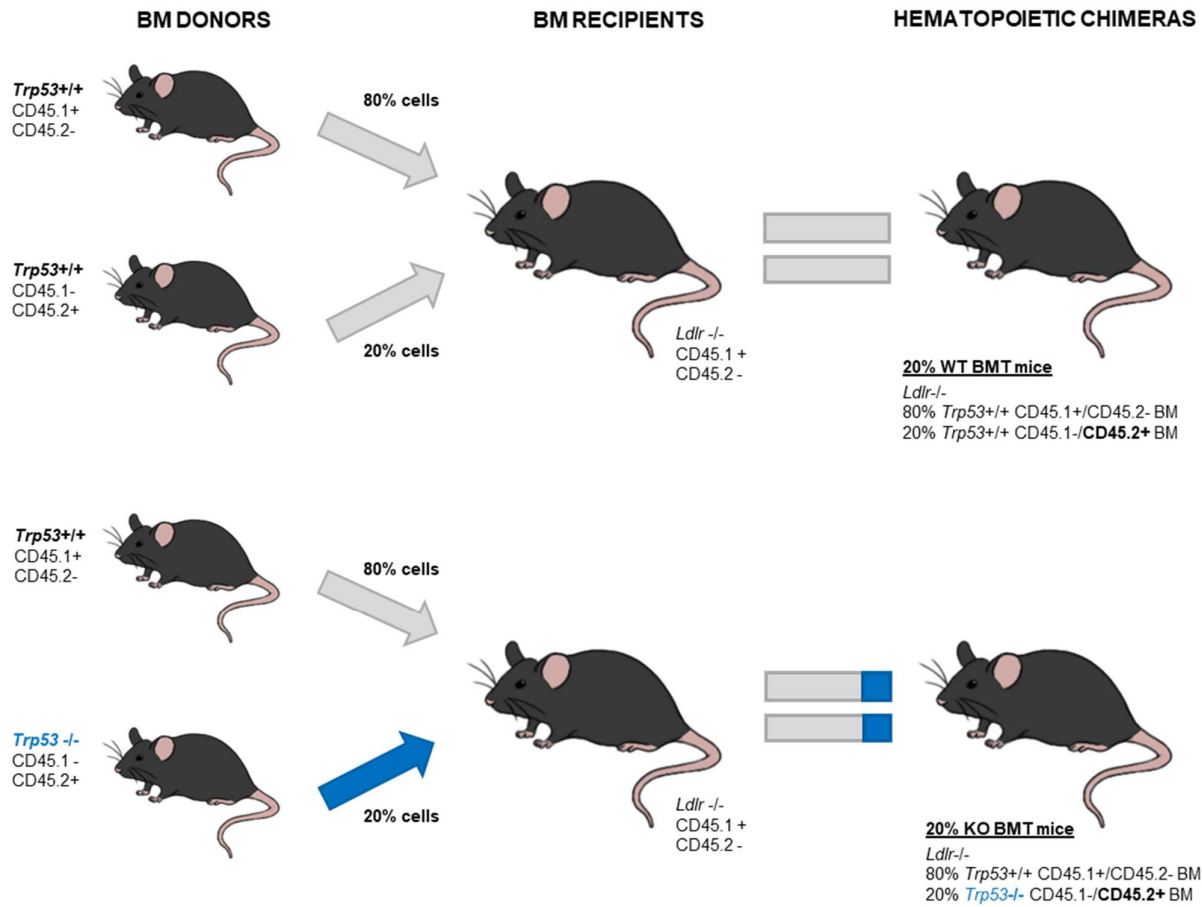

**Supplementary Figure 1. A competitive (80:20) bone marrow transplantation approach to generate a murine model of p53-deficient CHIP.**

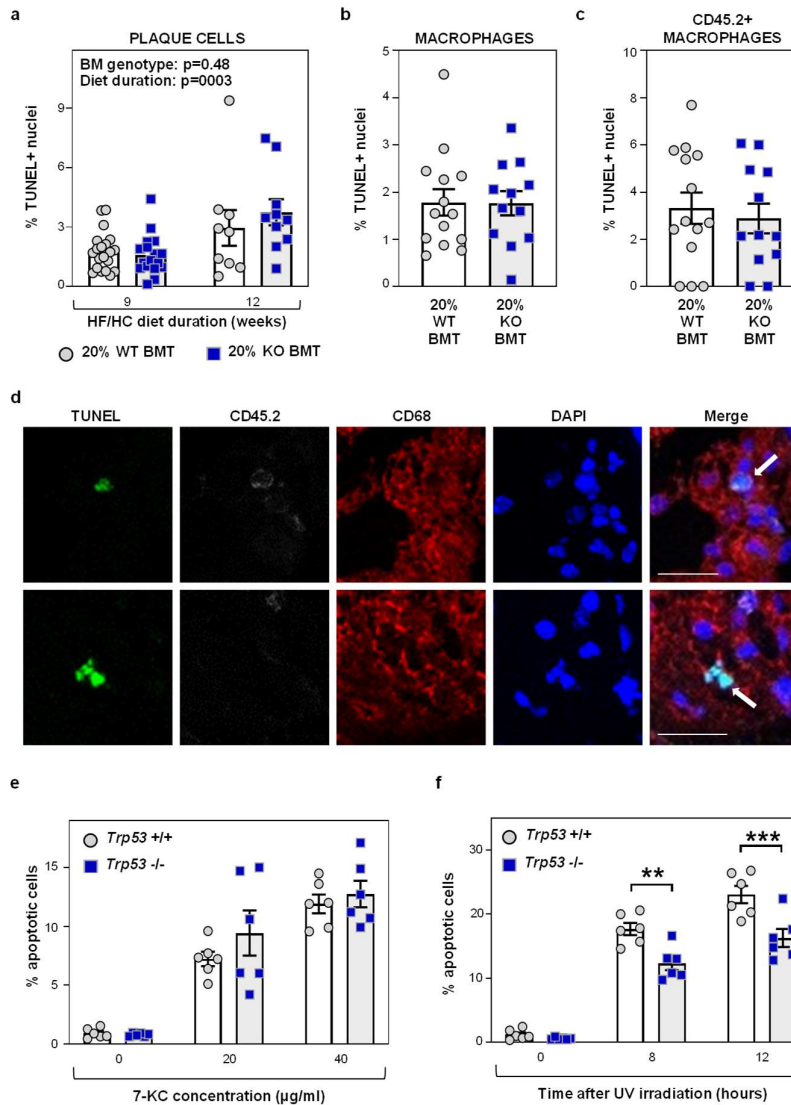

**Supplementary Figure 2. No effect of p53-deficient CHIP on murine plaque macrophage apoptosis. a-d)** 20% KO-BMT male mice and 20% WT-BMT controls were fed a high-fat/high cholesterol (HF/HC) diet for 9 or 12 weeks, starting 4 weeks after BMT (mean±SEM, n=14 20% WT-BMT mice [9 weeks HF/HC], n=12 20% KO-BMT mice [9 weeks HF/HC], n=9 20% WT-BMT mice [12 weeks HF/HC], n=10 mice 20% KO-BMT mice [12 weeks HF/HC]). Percentage of apoptotic nuclei within total plaque cells **(a)**, plaque macrophages **(b)** and CD45.2+ macrophages **(c)** were quantified by TUNEL (green) in aortic root sections stained with anti-CD45.2 antibody (white), anti-CD68 antibody (macrophages, red) and DAPI (nuclei, blue). p values in **(a)** were calculated using a two-way ANOVA. Representative images of the immunofluorescent staining are shown **(d)**. Arrows point to examples of TUNEL-positive macrophages (upper panel, CD45.2+; lower panel, CD45.2-). Scale bars: 25  $\mu$ m. **e)** Apoptotic cell quantification in cultured *Trp53*<sup>-/-</sup> and *+/+* bone marrow-derived macrophages after 7-ketocholesterol (7KC) treatment for 24h, assessed by propidium iodide staining of cellular DNA content and flow cytometry identification of hypodiploid cells (mean±SEM, n=6 *Trp53*<sup>+/+</sup> mice, n=6 *Trp53*<sup>-/-</sup> mice). **f)** UV irradiation-induced apoptosis was used as positive control. (mean±SEM, n=6 *Trp53*<sup>+/+</sup> mice, n=6 *Trp53*<sup>-/-</sup> mice). A two-way ANOVA with Sidak's multiple comparison test was used for statistical analysis (\*\*p<0.01;\*\*\*p<0.001).

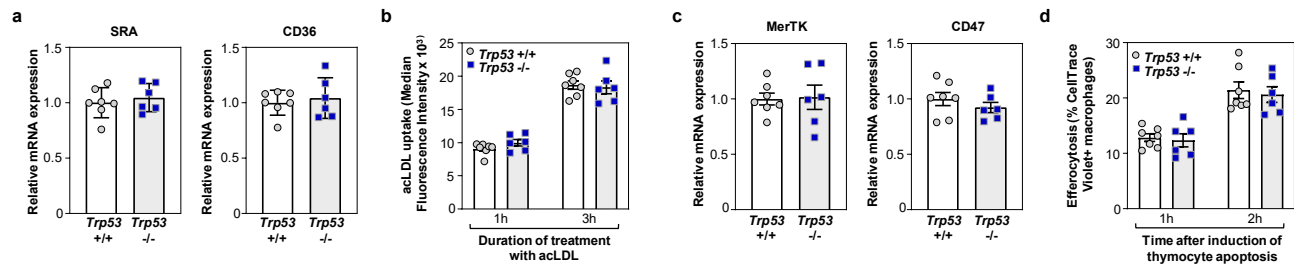

**Supplementary Figure 3. No effect of p53 deficiency on the uptake of modified LDL or apoptotic cells by macrophages.** Thioglycolate-elicited peritoneal macrophages were isolated from *Trp53*<sup>-/-</sup> mice and *Trp53*<sup>+/+</sup> controls (n=7 *Trp53*<sup>+/+</sup> mice, n=6 *Trp53*<sup>-/-</sup> mice). **a**) qPCR analysis of the expression of scavenger receptors SRA and CD36 (mean±SEM). **b**) Flow cytometry analysis of fluorescently labeled acetylated low-density lipoprotein (acLDL) uptake by macrophages treated with 5 µg/mL acLDL (mean±SEM). **c**) qPCR analysis of the expression of efferocytosis modulators MerTK and CD47 (mean±SEM). **d**) Flow cytometry analysis of efferocytosis by macrophages, assessed based on the uptake of CellTrace Violet-stained apoptotic thymocytes (mean±SEM).

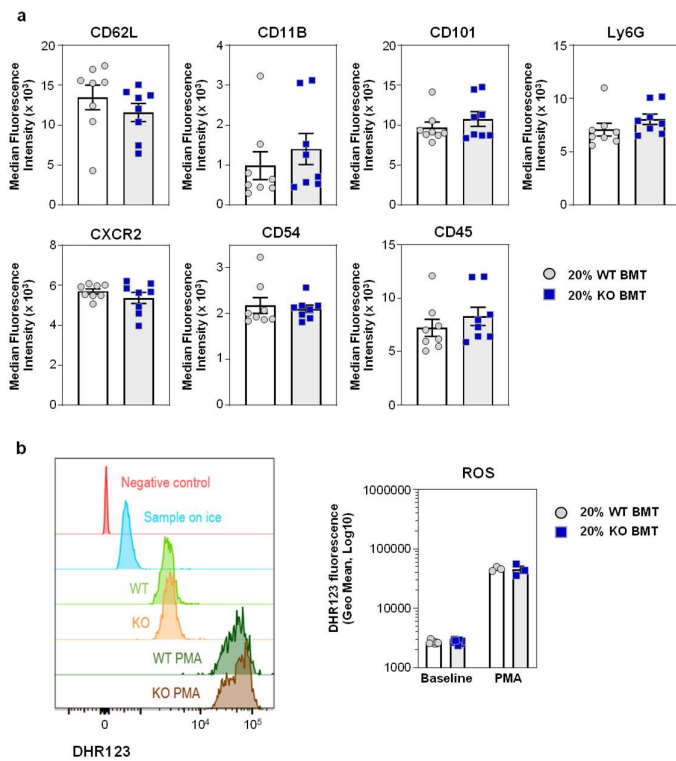

**Supplementary Figure 4. No effect of p53 deficiency on neutrophil functionality.** 20% KO-BMT male mice and 20% WT-BMT controls were fed a high-fat/high-cholesterol (HF/HC) diet for 4 weeks, starting 4 weeks after BMT. **a**) Expression levels of several phenotype markers in circulating neutrophils, evaluated by flow cytometry (mean±SEM, n=8 20% WT-BMT mice, n=8 20% KO-BMT mice). **b**) Quantification of reactive oxygen species (ROS) levels by DHR123 staining and flow cytometry analysis of circulating neutrophils in resting conditions and after stimulation with 133 nM phorbol-12-myristate-13-acetate (PMA) for 20 min (mean±SEM, n=8 20% WT-BMT mice

[baseline], n=8 20% KO-BMT mice [baseline], n=3 20% WT-BMT mice [PMA], n=3 20% KO-BMT mice [PMA]. Representative histograms are shown.

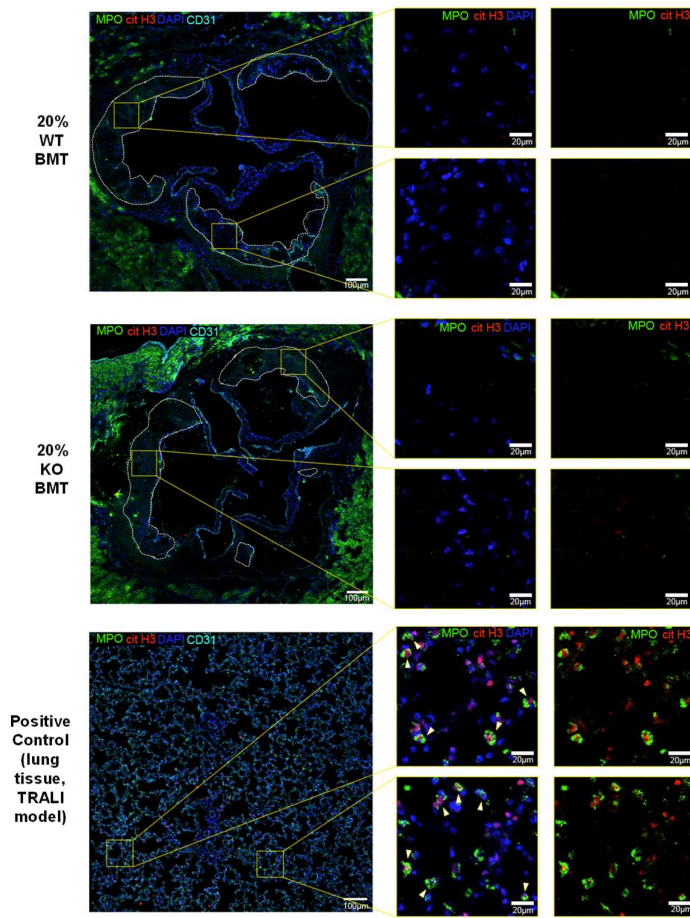

**Supplementary Figure 5. No effect of p53-deficient CHIP on the formation of neutrophil extracellular traps (NETs) in murine atherosclerotic plaques.** NETosis was assessed in aortic root sections from 20% KO-BMT male mice and 20% WT-BMT controls fed a HF/HC diet for 9 weeks (n=3 per BM genotype), by immunofluorescent staining with an anti-MPO antibody (green), anti-citrullinated histone 3 (cit H3) antibody (red), anti-CD31 antibody (cyan) and DAPI (nuclei, blue). Lung sections obtained from a mouse model of transfusion-related acute lung injury (TRALI) were used as positive control. Triple-stained events (MPO, cit H3, and DAPI) were considered NETs. No NETosis was observed in atherosclerotic plaques, regardless of BM genotype. Representative images are shown; atherosclerotic plaques are delineated by dashed lines. Triangles in lung sections indicate examples of NETs. Scale bars, 100  $\mu\text{m}$  or 20  $\mu\text{m}$  for magnified fields.

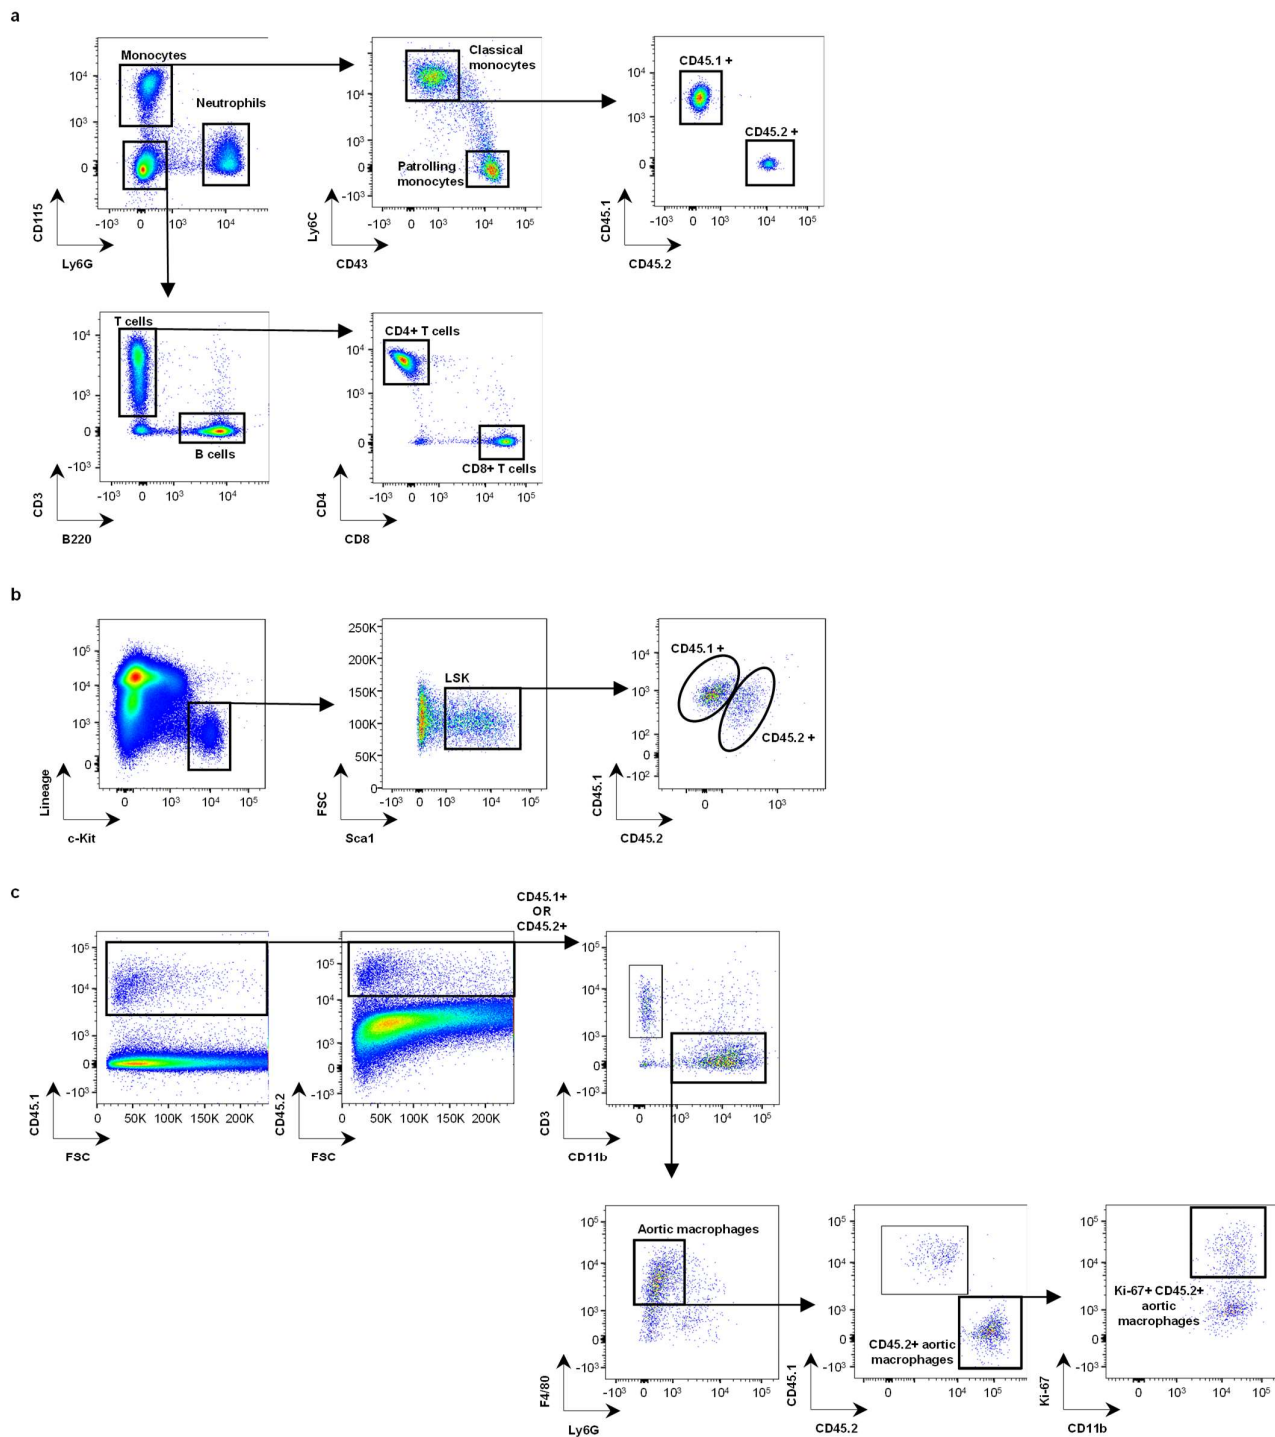

**Supplementary Figure 6. Summary of gating strategies in flow cytometry experiments. a)** Gating strategy for white blood cell lineages (initially gated as single, live CD45<sup>+</sup> cells). The final CD45.1/CD45.2 gating is shown exclusively for classical monocytes for simplicity, but the same gating was applied to other white blood cell lineages. **b)** Gating strategy for bone marrow hematopoietic stem and progenitor (LSK) cells (initially gated as single, live cells). **c)** Gating strategy for aortic macrophages (initially gated as single, live cells).

|                                     | UKBB (N=37,657) |            | MGBB (N=12,465) |            |
|-------------------------------------|-----------------|------------|-----------------|------------|
|                                     | All CHIP        | Large CHIP | All CHIP        | Large CHIP |
| <i>CHIP</i> (%)                     | 2194 (5.8)      | 911 (2.4)  | 657 (5.3)       | 314 (2.5)  |
| >1 <i>CHIP</i> Mutation (%)         | 191 (0.5)       | 70 (0.2)   | 55 (0.4)        | 16 (0.1)   |
| <i>DNMT3A</i> (%)                   | 1401 (3.8)      | 489 (1.4)  | 311 (2.6)       | 144 (1.2)  |
| <i>TET2</i> (%)                     | 347 (1.0)       | 181 (0.5)  | 132 (1.1)       | 61 (0.5)   |
| <i>JAK2</i> (%)                     | 17 (0.0)        | 17 (0.0)   | 5 (0.0)         | 5 (0.0)    |
| <i>ASXL1</i> (%)                    | 152 (0.4)       | 100 (0.3)  | 47 (0.4)        | 21 (0.2)   |
| <i>Splicing Factor Mutation</i> (%) | 49 (0.1)        | 28 (0.1)   | 17 (0.1)        | 8 (0.1)    |
| <i>TP53</i> (%)                     | 36 (0.1)        | 11 (0.0)   | 20 (0.2)        | 12 (0.1)   |
| <i>PPM1D</i> (%)                    | 32 (0.1)        | 12 (0.0)   | 32 (0.3)        | 13 (0.1)   |
| <i>TP53 or PPM1D</i> (%)            | 68 (0.2)        | 23 (0.1)   | 52 (0.4)        | 25 (0.2)   |

**Supplementary Table 1. CHIP gene carrier count by cohort.** Splicing Factor Mutations refer to the following CHIP genes: *LUC7L2*, *PRPF8*, *SF3B1*, *SRSF2*, *U2AF1*, and *ZRSR2*. Large CHIP refers to mutations with variant allele frequency > 10%.

|                                                          | UK Biobank    |               |        | MGB Biobank   |               |        |
|----------------------------------------------------------|---------------|---------------|--------|---------------|---------------|--------|
|                                                          | -CHIP         | +CHIP         | p      | -CHIP         | +CHIP         | p      |
| <i>n</i>                                                 | 35463         | 2194          |        | 11808         | 657           |        |
| <i>age (mean (SD))</i>                                   | 56.81 (7.84)  | 60.59 (6.57)  | <0.001 | 46.13 (14.65) | 60.12 (12.05) | <0.001 |
| <i>Sex = Male (%)</i>                                    | 16379 (46.2)  | 1042 (47.5)   | 0.242  | 4937 (41.8)   | 304 (46.3)    | 0.027  |
| <i>Race (%)</i>                                          |               |               | NA     |               |               | 0.002  |
| <i>White</i>                                             | 35463 (100.0) | 2194 (100.0)  |        | 9449 (80.0)   | 566 (86.1)    |        |
| <i>Black</i>                                             |               |               |        | 723 (6.1)     | 27 (4.1)      |        |
| <i>Asian</i>                                             |               |               |        | 465 (3.9)     | 19 (2.9)      |        |
| <i>Other</i>                                             |               |               |        | 474 (4.0)     | 12 (1.8)      |        |
| <i>Unknown</i>                                           |               |               |        | 697 (5.9)     | 33 (5.0)      |        |
| <i>Smoking Status (%)</i>                                |               |               | <0.001 |               |               | <0.001 |
| <i>Current</i>                                           | 3027 (8.5)    | 220 (10.0)    |        | 288 (2.4)     | 17 (2.6)      |        |
| <i>Previous</i>                                          | 12664 (35.7)  | 900 (41.0)    |        | 3662 (31.0)   | 261 (39.7)    |        |
| <i>Never</i>                                             | 19772 (55.8)  | 1074 (49.0)   |        | 7183 (60.8)   | 351 (53.4)    |        |
| <i>Alcohol intake (drinks in last 4wk) (mean (SD))</i>   | 11.37 (9.89)  | 11.67 (10.11) | 0.156  |               |               |        |
| <i>Exercise frequency (days in last 4wk) (mean (SD))</i> | 8.34 (6.38)   | 8.45 (6.43)   | 0.591  |               |               |        |
| <i>Townsend Deprivation Index (mean (SD))</i>            | -1.55 (2.81)  | -1.65 (2.75)  | 0.137  |               |               |        |
| <i>Significant life stressor in last 2y (%)</i>          | 16915 (47.8)  | 1030 (47.1)   | 0.535  |               |               |        |
| <i>Handfulls of sweets/day (mean (SD))</i>               | 1.09 (1.17)   | 0.93 (1.19)   | 0.399  |               |               |        |
| <i>Vegetable servings/day (mean (SD))</i>                | 1.08 (0.54)   | 1.02 (0.49)   | 0.283  |               |               |        |
| <i>BMI (mean (SD))</i>                                   | 27.39 (4.76)  | 27.48 (4.55)  | 0.414  | 28.14 (6.35)  | 28.55 (6.33)  | 0.132  |
| <i>Prevalent Type 2 Diabetes Mellitus (%)</i>            | 956 (2.7)     | 70 (3.2)      | 0.189  | 505 (4.3)     | 40 (6.1)      | 0.035  |
| <i>Prevalent Coronary Artery Disease (%)</i>             | 2040 (5.8)    | 171 (7.8)     | <0.001 | 378 (3.2)     | 42 (6.4)      | <0.001 |
| <i>Prevalent Hypertension (%)</i>                        | 10650 (30.0)  | 782 (35.6)    | <0.001 | 1893 (16.0)   | 193 (29.4)    | <0.001 |
| <i>Prevalent Hypercholesterolemia (%)</i>                | 6159 (17.4)   | 448 (20.4)    | <0.001 | 1739 (14.7)   | 172 (26.2)    | <0.001 |

**Supplementary Table 2 - Demographic and clinical characteristics for CHIP carriers and controls in the UK and Mass General Brigham Biobanks.** P-values reflect chi-square tests comparing CHIP carriers to controls across each phenotypic category.

| <b>CHIP Status</b> | <b>HR</b> | <b>SE</b> | <b>P</b> |
|--------------------|-----------|-----------|----------|
| All CHIP           | 1.72      | 0.19      | 0.0033   |
| Large CHIP         | 2.54      | 0.23      | 0.000034 |
| DDR CHIP           | 3.09      | 0.71      | 0.11     |

**Supplementary Table 3. PAD association results when removing prevalent CAD from the analysis**

| <b>CHIP Status</b> | <b>HR</b> | <b>SE</b> | <b>P</b> |
|--------------------|-----------|-----------|----------|
| All CHIP           | 1.61      | 0.18      | 0.00772  |
| Large CHIP         | 2.24      | 0.22      | 0.0003   |
| DDR CHIP           | 4.24      | 0.58      | 0.013    |

**Supplementary Table 4 - PAD association results when adding CAD as a covariate to the model for analysis**

|                                         | <i>UK Biobank</i> |             |       | <i>MGB Biobank</i> |            |       |
|-----------------------------------------|-------------------|-------------|-------|--------------------|------------|-------|
|                                         | No CHIP           | CHIP        | p     | No CHIP            | CHIP       | p     |
| <i>Composite Atherosclerosis (%)</i>    | 1697 (100.0)      | 178 (100.0) | NA    | 878 (100.0)        | 75 (100.0) | NA    |
| <i>Coronary Artery Disease (%)</i>      | 917 (54.0)        | 94 (52.8)   | 0.815 | 666 (75.9)         | 59 (78.7)  | 0.684 |
| <i>Peripheral Artery Disease (%)</i>    | 224 (13.2)        | 33 (18.5)   | 0.063 | 234 (26.7)         | 19 (25.3)  | 0.911 |
| <i>Cerebral Atherosclerosis (%)</i>     | 526 (31.0)        | 39 (21.9)   | 0.015 | 158 (18.0)         | 19 (25.3)  | 0.157 |
| <i>Abdominal Aortic Aneurysm (%)</i>    | 76 (4.5)          | 13 (7.3)    | 0.133 | 18 (2.1)           | 0 (0.0)    | 0.418 |
| <i>Aortic Aneurysm (%)</i>              | 143 (8.4)         | 24 (13.5)   | 0.034 | 55 (6.3)           | 4 (5.3)    | 0.943 |
| <i>Other Aneurysm (%)</i>               | 180 (10.6)        | 30 (16.9)   | 0.017 | 99 (11.3)          | 8 (10.7)   | 1     |
| <i>Chronic Mesenteric Ischemia (%)</i>  | 3 (0.2)           | 0 (0.0)     | 1     | 6 (0.7)            | 1 (1.3)    | 1     |
| <i>Acute Mesenteric Ischemia (%)</i>    | 37 (2.2)          | 8 (4.5)     | 0.097 | 1 (0.1)            | 0 (0.0)    | 1     |
| <i>Renal Artery Atherosclerosis (%)</i> | 1 (0.1)           | 0 (0.0)     | 1     | 14 (1.6)           | 0 (0.0)    | 0.547 |

**Supplementary Table 5. Breakdown of composite incident atherosclerosis events by disease in the UK Biobank and MGB Biobank.**



| <b>Gene</b>              | <b>HR</b> | <b>95% CI</b> | <b>P</b> |
|--------------------------|-----------|---------------|----------|
| DNMT3A                   | 1.08      | 0.86-1.35     | 0.5      |
| TET2                     | 2.05      | 1.54-2.71     | 6.30E-07 |
| TP53                     | 2.31      | 1.03-5.16     | 0.042    |
| PPM1D                    | 2.63      | 1.40-4.95     | 0.0027   |
| ASXL1                    | 1.73      | 1.09-2.76     | 0.021    |
| Splicing Factor Mutation | 1.62      | 0.72-3.66     | 0.24     |
| Multiple Mutations       | 1.70      | 1.06-2.71     | 0.026    |
| TP53 or PPM1D            | 2.51      | 1.52-4.13     | 0.00032  |

**Supplementary Table 6. Association of CHIP carrier state, stratified by CHIP gene, with incident CAD events in the UK Biobank (UKB) and Mass General Brigham Biobank (MGBB).** Results were combined using an inverse-variance weighted fixed effects meta-analysis.

**Supplementary Tables 7-9 are provided in a separate Excel file.**

| Antibody                                                                      | Clone      | Supplier                            | Ref          | Dilution |
|-------------------------------------------------------------------------------|------------|-------------------------------------|--------------|----------|
| Alkaline phosphatase-conjugated mouse anti-smooth muscle $\alpha$ -actin      | 1A4        | Sigma                               | A6691        | 1/50     |
| Anti-Mouse/Human Mac-2 (Galectin-3), Purified monoclonal antibody (rat IgG2a) | M3/38      | Cedarlane Labs                      | CL8942AP     | 1/300    |
| Rabbit anti-Ki-67 monoclonal antibody                                         | SP6        | Abcam                               | ab16667      | 1/100    |
| Rat anti mouse CD68 primary antibody                                          | FA-11      | BioRad                              | MCA1957      | 1/100    |
| Alexa Fluor 647-conjugated anti-CD45.2 antibody                               | 104        | BioLegend                           | 109817       | 1/200    |
| Recombinant Anti-Histone H3 (citrulline R2 + R8 + R17) antibody               | RM1001     | Abcam                               | ab5103       | 1/200    |
| CD31 monoclonal antibody                                                      | 2H8        | ThermoFisher                        | MA3105       | 1/200    |
| (Biotinylated)- Human/Mouse Myeloperoxidase/MPO Antibody                      | Polyclonal | R&D Systems (biotinylated in house) | AF3667       | 1/200    |
| BrdU Monoclonal Antibody                                                      | MoBV-1     | ThermoFisher                        | B35128       | 1/100    |
| Biotin-conjugated goat anti-rat secondary antibody IgG                        | -          | Vector Laboratories                 | BA9401       | 1/400    |
| Biotin-conjugated horse anti-rabbit secondary antibody IgG                    | -          | Vector Laboratories                 | BA1100       | 1/400    |
| Alexa Fluor 568-conjugated goat anti-rat IgG (H+L) antibody                   | Polyclonal | ThermoFisher                        | A-11077      | 1/500    |
| Alexa Fluor 568-conjugated goat anti-rabbit IgG (H+L) antibody                | Polyclonal | ThermoFisher                        | A-11011      | 1/500    |
| Alexa Fluor 488-conjugated goat anti-mouse IgG secondary (H+L) antibody       | Polyclonal | ThermoFisher                        | A-11029      | 1/500    |
| Alexa Fluor 647-conjugated goat anti-hamster IgG secondary antibody           | Polyclonal | Jackson Immunoresearch              | 127-605-099  | 1/500    |
| Alexa fluor-488 conjugated Streptavidin antibody                              | -          | BioLegend                           | 405235       | 1/500    |
| Biotin rat anti mouse-CD11b antibody                                          | M1/70      | BD Biosciences                      | 559971       | 1/50     |
| Biotin rat anti mouse Gr-1 antibody                                           | RB6-8C5    | BD Biosciences                      | 559971       | 1/50     |
| Biotin rat anti mouse Ter119 antibody                                         | TER-119    | BD Biosciences                      | 559971       | 1/50     |
| Biotin rat anti mouse B220 (CD45R) antibody                                   | RA3-6B2    | BD Biosciences                      | 559971       | 1/50     |
| Biotin hamster anti mouse CD3e antibody                                       | 145-2C11   | BD Biosciences                      | 559971       | 1/50     |
| Biotin anti mouse CD127 (IL-7R $\alpha$ ) antibody                            | A7R34      | BioLegend                           | 135005       | 1/100    |
| BV421-conjugated Streptavidin                                                 | -          | BD Biosciences                      | 563259       | 1/500    |
| APC-Cy7-conjugated anti-CD45 antibody                                         | 30-F11     | BioLegend                           | 103116       | 1/200    |
| PE-Cy7-conjugated anti-CD45.1 antibody                                        | A20        | eBioscience                         | 25-0453-82   | 1/100    |
| PE-Cy7-conjugated anti-CD45.1 antibody                                        | A20        | BioLegend                           | 110730       | 1/200    |
| PerCP-Cy5.5-conjugated anti-CD45.1                                            | A20        | BioLegend                           | 110728       | 1/100    |
| eFluor450-conjugated anti-CD45.2 antibody                                     | 104        | eBioscience                         | 48-0454-82   | 1/100    |
| FITC-conjugated anti-CD45.2 antibody                                          | 104        | eBioscience                         | 11-0454-82   | 1/100    |
| FITC-conjugated anti-CD45.2 antibody                                          | 104        | BioLegend                           | 109806       | 1/200    |
| APC-conjugated anti-CD45.2 antibody                                           | 104        | BioLegend                           | 109814       | 1/200    |
| FITC-conjugated anti-CD11b antibody                                           | M1/70      | eBioscience                         | 11-0112-82   | 1/100    |
| eFluor450-conjugated anti-CD11b antibody                                      | M1/70      | eBioscience                         | 48-0112-82   | 1/100    |
| FITC-conjugated anti-CD11b antibody                                           | M1/70      | Invitrogen                          | 11-0112-82   | 1/100    |
| PE-conjugated anti-CD11b antibody                                             | M1/70      | Tonbo Biosciences                   | 50-0112-U100 | 1/200    |
| BV510-conjugated anti-CD11b antibody                                          | M1/70      | BioLegend                           | 101245       | 1/200    |
| PE-conjugated anti-F4/80 antibody                                             | 521204     | R&D Systems                         | FAB5580P     | 1/100    |
| PE-conjugated anti-F4/80 antibody                                             | BM8.1      | Tonbo bioscience                    | 50-4801-v025 | 1/100    |
| PE-conjugated anti-CD115 (c-fms) antibody                                     | AFS98      | eBioscience                         | 12-1152-82   | 1/100    |
| PerCP-Cy5.5-conjugated anti-Ly6G antibody                                     | 1A8        | BD Biosciences                      | 560602       | 1/100    |
| BV510-conjugated anti-Ly6G antibody                                           | 1A8        | BD Biosciences                      | 740157       | 1/100    |
| BUV737-conjugated anti-Ly6G antibody                                          | 1A8        | BD Biosciences                      | 741813       | 1/200    |
| APC-Cy7-conjugated anti-B220 antibody                                         | RA3-6B2    | BD Biosciences                      | 552094       | 1/100    |
| PE-eFluor610-conjugated anti-CD3 antibody                                     | 145-2C11   | eBioscience                         | 61-0031-82   | 1/100    |
| FITC-conjugated anti-CD4 antibody                                             | RM4-5      | eBioscience                         | 11-0042-82   | 1/100    |
| BV510-conjugated anti-CD8a antibody                                           | 53-6.7     | BioLegend                           | 10752        | 1/100    |
| BV711-conjugated anti-CD43 antibody                                           | S7         | BD Biosciences                      | 740668       | 1/100    |
| PE-Cy7-conjugated anti-c-Kit (CD117) antibody                                 | 2B8        | BD Biosciences                      | 553355       | 1/50     |
| AlexaFluor647-conjugated anti-Sca1 (Ly-6A/E) antibody                         | D7         | BD Biosciences                      | 558162       | 1/50     |

|                                                  |            |                   |            |        |
|--------------------------------------------------|------------|-------------------|------------|--------|
| PerCP-Cy5.5-conjugated anti-mouse Ki-67 antibody | 16A8       | BioLegend         | 652424     | 1/300  |
| PE-conjugated anti-CD62L antibody                | MEL-14     | eBioscience       | 12-0621-83 | 1/200  |
| PerCP-Cy5.5-conjugated anti-CXCR2 antibody       | SA044g4    | BioLegend         | 149308     | 1/200  |
| PECy7-conjugated anti-CD101 antibody             | Moushi101  | ThermoFisher      | 25-1011-82 | 1/200  |
| AlexaFluor 647-conjugated anti-CD54 antibody     | YN1/1.7.4  | BioLegend         | 116114     | 1/200  |
| Anti-p53 (D2H90) Rabbit mAb (Rodent Specific)    | D2H90      | Cell Signaling    | 32532S     | 1/1000 |
| HRP-conjugated anti-alpha tubulin                | DM1A       | Abcam             | ab40742    | 1/2000 |
| Goat anti-rabbit HRP antibody                    | Polyclonal | Life Technologies | A18871     | 1/2000 |

**Supplementary Table 10. Antibodies used for immunostaining in experimental studies.**

| Gene                          | FW primer                  | RV primer                |
|-------------------------------|----------------------------|--------------------------|
| <i>Actb</i> ( $\beta$ -actin) | GGCTGTATTCCCCTCCATCG       | CCAGTTGGTAACAATGCCATGT   |
| <i>18S</i>                    | AGTTCCAGCACATTTTGCGAG      | TCATCCTCCGTGAGTTCTCCA    |
| <i>Rplp0</i> (36B4)           | GCTCCAAGCAGATGCAGCA        | CCGGATGTGAGGCAGCAG       |
| <i>Trp53</i>                  | GTCACAGCACATGACGGAGG       | TCTTCCAGATGCTCGGGATAC    |
| <i>Cdkn1a</i>                 | CCTGGTGATGTCCGACCTG        | CCATGAGCGCATCGCAATC      |
| <i>Ccnb1</i>                  | AAGGTGCCTGTGTGTGAAC        | GTCAGCCCCATCATCTGCG      |
| <i>Il1b</i>                   | TGACAGTGATGAGAATGACCTGTTC  | TTGGAAGCAGCCCTTCATCT     |
| <i>Il6</i>                    | GCTACCAAACCTGGATATAATCAGGA | CCAGGTAGCTATGGTACTCCAGAA |
| <i>Nlrp3</i>                  | ATTACCCGCCCGAGAAAGG        | TCGCAGCAAAGATCCACAC      |
| <i>Msr1</i> (SRA)             | TCAGACTGAAGGACTGGGA        | GGAGGCCCTTGAATGAAGGT     |
| <i>CD36</i>                   | TGCCCATGCCGAGAGTCT         | CAGAGGCGCACCAAACCT       |
| <i>Mertk</i>                  | TGCGTTTAATCACACCATT        | TGCCCCGAGCAATTCCTTTC     |
| <i>CD47</i>                   | TGCGGTTTCAGCTCAACTACTG     | GCTTTGCGCCTCCACATTAC     |

**Supplementary Table 11. Oligonucleotides used as primers in quantitative PCR analyses in experimental studies.**
